# Supplementary material for: Osteocytes regulate senescence of bone and bone marrow
Source: eLife. 2022 Oct 28;11:e81480. doi: 10.7554/eLife.81480 (PMC9678362; doi:10.7554/eLife.81480)
Supplement: Figure 1—figure supplement 1—source data 1. [file elife-81480-fig1-figsupp1-data1.xlsx]

## Sheet: Sheet1
Figure 1 - figure supplement 1C
	Empty lacuna(%)				Test details
	WT	DTAhet			Test name	Unpaired t test
	11.3348	86.3879
	10.232	90.1216				P value	Mean of WT	Mean of DTAhet	Difference	SE of difference	t ratio	df
	13.9292	82.6949			Empty lacuna(%)	<0.0001	10.48	86.27	75.79	1.918	39.53	10
	9.05703	82.3832
	10.5	83.5703
	7.8248	92.4763
