# Supplementary material for: Osteocytes regulate senescence of bone and bone marrow
Source: eLife. 2022 Oct 28;11:e81480. doi: 10.7554/eLife.81480 (PMC9678362; doi:10.7554/eLife.81480)
Supplement: Figure 1—source data 1. [file elife-81480-fig1-data1.xlsx]

## Sheet: Sheet1
Figure 1B				Figure 1D
	Empty lacuna(%)				Dendrites per osteocyte			Test details
	WT	DTAhet			WT	DTAhet		Test name	Unpaired t test
	15.4248	76.3158			21	11
	12.032	70.2116			23	22			P value	Mean of WT	Mean of DTAhet	Difference	SE of difference	t ratio	df
	10.2593	62.7943			16	17		Empty lacuna(%)	<0.0001	13.3	64.21	50.9	2.655	19.17	18
	13.053	62.1328			20	23		Dendrites per osteocyte	0.0045	27.45	24.98	-2.463	0.8583	2.87	214
	15.5	63.5073			26	31
	13.8021	72.1163			30	25
	18.7294	54.0563			28	28
	5.64516	52.5067			27	26
	15.0676				19	21
	11.8984				26	28
	15.1338				38	20
	13.0727				21	25
					23	19
					21	23
					32	22
					25	27
					18	29
					18	31
					15	27
					20	24
					17	33
					35	31
					34	26
					29	37
					26	30
					26	33
					31	22
					22	41
					24	18
					27	22
					30	18
					25	26
					31	23
					22	35
					25	25
					37	18
					39	21
					27	24
					28	24
					30	26
					26	18
					29	29
					34	23
					26	24
					37	22
					30	20
					26	27
					40	30
					23	29
					34	17
					26	40
					24	30
					19	25
					23	17
					25	33
					37	30
					27	28
					22	33
					27	23
					31	21
					22	19
					23	16
					33	18
					24	15
					27
					31
					18
					22
					15
					39
					30
					22
					38
					29
					25
					31
					30
					28
					22
					23
					25
					22
					30
					27
					18
					24
					22
					29
					23
					26
					27
					25
					29
					33
					26
					29
					32
					20
					33
					24
					26
					29
					26
					33
					32
					28
					28
					24
					33
					19
					31
					26
					29
					35
					28
					26
					30
					32
					22
					29
					26
					29
					21
					32
					27
					33
					32
					27
					41
					46
					28
					28
					31
					28
					27
					21
					34
					34
					42
					32
					21
					28
					29
					27
					24
					29
					35
					30
					26
					23
					35
					26
