# Supplementary material for: Osteocytes regulate senescence of bone and bone marrow
Source: eLife. 2022 Oct 28;11:e81480. doi: 10.7554/eLife.81480 (PMC9678362; doi:10.7554/eLife.81480)
Supplement: Figure 2—figure supplement 1—source data 1. [file elife-81480-fig2-figsupp1-data1.xlsx]

## Sheet: Sheet1
Figure 2 -figure supplement 1B																Figure 2 -figure supplement 1C
	BMD(g/cm3)			BV/TV(%)			Tb. N(1/mm)			Tb. Sp(mm)			Tb. Th(mm)				Ct. Th(mm)			Ct. Po(%)
	WT	DTAhet		WT	DTAhet		WT	DTAhet		WT	DTAhet		WT	DTAhet			WT	DTAhet		WT	DTAhet
	0.13061	0.05351		13.1171	2.73519		2.64072	0.70699		0.22222	0.18347		0.04967	0.03869			0.142	0.12021		29.8104	33.6043
	0.10108	0.02159		8.499	0.68283		1.74491	0.18719		0.30535	0.52055		0.04871	0.03648			0.12768	0.11002		32.1194	36.5706
	0.09959	0.01913		8.63329	1.19318		1.7669	0.31386		0.28228	0.61276		0.04886	0.03802			0.11987	0.08095		33.3186	45.1091
	0.14352			13.9337			2.8765			0.19355			0.04844				0.14503			29.2393
	0.13257			11.8463			2.42666			0.25785			0.04882				0.12565			32.5139
	Test details																Test details
	Test name	Unpaired t test				P value	Mean of WT	Mean of DTAhet	Difference	SE of difference	t ratio	df					Test name	Unpaired t test				P value	Mean of WT	Mean of DTAhet	Difference	SE of difference	t ratio	df
					BMD(g/cm3)	0.0008	0.1215	0.03141	-0.09006	0.01437	6.286	6									Ct. Th(mm)	0.0391	0.132	0.1037	-0.02832	0.01077	2.628	6
					BV/TV(%)	0.0008	11.21	1.537	-9.669	1.57	6.158	6									Ct. Po(%)	0.0422	31.4	38.43	7.028	2.732	2.572	6
					Tb. N(1/mm)	0.0012	2.291	0.4027	-1.888	0.3271	5.744	6
					Tb. Sp(mm)	0.1083	0.2523	0.4389	0.1867	0.09899	1.886	6
					Tb. Th(mm)	<0.0001	0.0489	0.03773	-0.01117	0.0005511	20.27	6
Figure 2 -figure supplement 1E
	BMD(g/cm3)			BV/TV(%)			Tb. N(1/mm)			Tb. Sp(mm)			Tb. Th(mm)
	WT	DTAhet		WT	DTAhet		WT	DTAhet		WT	DTAhet		WT	DTAhet
	0.19668	0.08388		18.3189	4.07767		3.94372	0.95604		0.13864	0.25526		0.04645	0.04265
	0.19471	0.08601		18.2613	5.09308		4.01217	1.23468		0.13678	0.23151		0.04551	0.04125
	0.20499	0.0969		19.266	2.98028		4.39024	1.02612		0.12301	0.12667		0.04388	0.02904
	0.21284			20.2666			4.2633			0.13318			0.04754
	0.21062			20.4851			4.56644			0.12806			0.04486
	Test details
	Test name	Unpaired t test				P value	Mean of WT	Mean of DTAhet	Difference	SE of difference	t ratio	df
					BMD(g/cm3)	<0.0001	0.204	0.08893	-0.115	0.00566	20.33	6
					BV/TV(%)	<0.0001	19.32	4.05	-15.27	0.7667	19.92	6
					Tb. N(1/mm)	<0.0001	4.235	1.072	-3.163	0.1663	19.01	6
					Tb. Sp(mm)	0.047	0.1319	0.2045	0.07255	0.0291	2.493	6
					Tb. Th(mm)	0.0499	0.04565	0.03765	-0.008001	0.003267	2.449	6
