# Supplementary material for: Osteocytes regulate senescence of bone and bone marrow
Source: eLife. 2022 Oct 28;11:e81480. doi: 10.7554/eLife.81480 (PMC9678362; doi:10.7554/eLife.81480)
Supplement: Figure 2—figure supplement 2—source data 1. [file elife-81480-fig2-figsupp2-data1.xlsx]

## Sheet: Sheet1
Figure 2 -figure supplement 2A
	Normal step sequence ratio(%)			Test details
	WT	DTAhet		Test name	Unpaired t test
	95.8804	72.2892
	95.6897	69.5652			P value	Mean of WT	Mean of DTAhet	Difference	SE of difference	t ratio	df
	100	40.678		Normal step sequence ratio(%)	0.0008	97.79	59.86	-37.93	7.977	4.754	10
	98.2759	87.5
	96.875	40
	100	49.1228
Figure 2 -figure supplement 2C
	LF - Stride length(cm)			LH - Stride length(cm)			RF - Stride length(cm)			RH - Stride length(cm)
	WT	DTAhet		WT	DTAhet		WT	DTAhet		WT	DTAhet
	2.74328	1.3028		2.85882	0.8247		2.7706	1.0616		2.57963	1.3881
	4.21125	1.4929		4.3789	1.1017		4.27628	1.4212		4.11923	1.9659
	4.06429	1.5506		4.09548	1.2077		3.99565	1.4543		3.88903	1.3154
	3.06392	1.929		3.2224	1.8775		3.0964	2.3043		3.08185	1.692
	3.32037	1.691		3.40062	2.1355		3.32115	1.5626		3.40885	4.4239
	3.4419	1.551		3.3766	1.7612		3.4626	1.7725		3.4652	1.612
	Test details
	Test name	Unpaired t test
		P value	Mean of WT	Mean of DTAhet	Difference	SE of difference	t ratio	df
	LF - Stride length(cm)	<0.0001	3.474	1.586	-1.888	0.2476	7.626	10
	LH - Stride length(cm)	<0.0001	3.555	1.485	-2.071	0.3128	6.62	10
	RF - Stride length(cm)	<0.0001	3.487	1.596	-1.891	0.2855	6.623	10
	RH - Stride length(cm)	0.0286	3.424	2.066	-1.358	0.5314	2.555	10
Figure 2 -figure supplement 2D
	LF - Swing speed(cm/s)			LH - Swing speed(cm/s)			RF - Swing speed(cm/s)			RH - Swing speed(cm/s)
	WT	DTAhet		WT	DTAhet		WT	DTAhet		WT	DTAhet
	12.9283	16.0344		17.1413	10.5837		16.5905	11.5157		16.7073	8.0856
	39.8686	19.4184		41.7519	15.7247		39.93	20.9461		35.3013	5.0276
	32.3481	11.517		35.8015	13.6877		32.5361	15.7103		31.5899	3.3913
	17.8186	20.4401		24.5619	12.4129		22.3885	22.9658		22.1471	10.8077
	28.4	8.9065		29.9823	12.6249		25.0548	6.2862		24.489	6.6524
	25.8171	9.6124		23.4099	7.1722		24.535	13.6491		28.0484	6.9662
	Test details
	Test name	Unpaired t test
		P value	Mean of WT	Mean of DTAhet	Difference	SE of difference	t ratio	df
	LF - Swing speed(cm/s)	0.0242	26.2	14.32	-11.88	4.479	2.652	10
	LH - Swing speed(cm/s)	0.0014	28.77	12.03	-16.74	3.846	4.353	10
	RF - Swing speed(cm/s)	0.0193	26.84	15.18	-11.66	4.188	2.784	10
	RH - Swing speed(cm/s)	<0.0001	26.38	6.822	-19.56	2.927	6.681	10
