# Supplementary material for: Osteocytes regulate senescence of bone and bone marrow
Source: eLife. 2022 Oct 28;11:e81480. doi: 10.7554/eLife.81480 (PMC9678362; doi:10.7554/eLife.81480)
Supplement: Figure 2—source data 1. [file elife-81480-fig2-data1.xlsx]

## Sheet: Sheet1
Figure 2B																Figure 2C
	BMD(g/cm3)			BV/TV(%)			Tb. N(1/mm)			Tb. Sp(mm)			Tb. Th(mm)				Ct. Th(mm)			Ct. Po(%)
	WT	DTAhet		WT	DTAhet		WT	DTAhet		WT	DTAhet		WT	DTAhet			WT	DTAhet		WT	DTAhet
	0.14316	0.02512		12.587	1.52742		2.49979	0.3733		0.22677	0.17372		0.05035	0.04092			0.14174	0.12714		29.6953	32.9152
	0.11998	0.02965		9.95774	0.69144		2.05754	0.17363		0.2635	0.59898		0.0484	0.03982			0.11878	0.09113		33.8147	40.4009
	0.14861	0.02277		14.078	1.32764		2.673	0.30849		0.23351	0.60743		0.05267	0.04304			0.14677	0.11788		28.8049	34.4267
	0.14484	0.01771		15.4348	1.15641		2.92656	0.31027		0.21463	0.75325		0.05274	0.03727			0.16113	0.08304		26.6951	43.1896
	0.15829			14.0386			2.58057			0.21749			0.0544				0.15275			28.0366
	0.15102			14.3149			2.79268			0.21084			0.05126				0.12076			33.7293
	0.12596			13.3591			2.68454			0.23415			0.04976				0.12011			33.6655
	Test details																Test details
	Test name	Unpaired t test				P value	Mean of WT	Mean of DTAhet	Difference	SE of difference	t ratio	df					Test name	Unpaired t test				P value	Mean of WT	Mean of DTAhet	Difference	SE of difference	t ratio	df
					BMD(g/cm3)	<0.0001	0.1417	0.02381	-0.1179	0.007284	16.18	9									Ct. Th(mm)	0.0214	0.1374	0.1048	-0.03264	0.01174	2.78	9
					BV/TV(%)	<0.0001	13.4	1.176	-12.22	0.9044	13.51	9									Ct. Po(%)	0.0144	30.63	37.73	7.099	2.349	3.022	9
					Tb. N(1/mm)	<0.0001	2.602	0.2914	-2.311	0.1451	15.93	9
					Tb. Sp(mm)	0.0085	0.2287	0.5333	0.3046	0.09092	3.351	9
					Tb. Th(mm)	<0.0001	0.05137	0.04026	-0.01111	0.001362	8.153	9
Figure 3E-F																Figure 3G
	BMD(g/cm3)			BV/TV(%)			Tb. N(1/mm)			Tb. Sp(mm)			Tb. Th(mm)				Ct. Th(mm)			Ct. Po(%)
	WT	DTAhet		WT	DTAhet		WT	DTAhet		WT	DTAhet		WT	DTAhet			WT	DTAhet		WT	DTAhet
	0.14338	0.04108		6.18306	0.03961		1.17739	0.01578		0.22677	0.17372		0.05251	0.0251			0.20205	0.14786		22.386	28.8883
	0.17471	0.00918		8.14505	0.01179		1.71203	0.00523		0.2635	0.59898		0.04758	0.02256			0.21031	0.13399		21.4526	32.0665
	0.18887	0.01589		9.47451	0.02674		1.81746	0.00956		0.23351	0.60743		0.05213	0.02796			0.20842	0.14596		21.8965	29.1522
	Test details																Test details
	Test name	Unpaired t test				P value	Mean of WT	Mean of DTAhet	Difference	SE of difference	t ratio	df					Test name	Unpaired t test				P value	Mean of WT	Mean of DTAhet	Difference	SE of difference	t ratio	df
					BMD(g/cm3)	0.0009	0.169	0.02205	-0.1469	0.01658	8.862	4									Ct. Th(mm)	0.0002	0.2069	0.1426	-0.06432	0.005009	12.84	4
					BV/TV(%)	0.0012	7.934	0.02605	-7.908	0.956	8.272	4									Ct. Po(%)	0.0015	21.91	30.04	8.124	1.053	7.713	4
					Tb. N(1/mm)	0.0014	1.569	0.01019	-1.559	0.1982	7.866	4
					Tb. Sp(mm)	0.0007	0.2885	0.806	0.5175	0.05492	9.424	4
					Tb. Th(mm)	0.0003	0.05074	0.02521	-0.03171	0.002223	11.49	4
Figure 3I
	BMD(g/cm3)			BV/TV(%)			Tb. N(1/mm)			Tb. Sp(mm)			Tb. Th(mm)
	WT	DTAhet		WT	DTAhet		WT	DTAhet		WT	DTAhet		WT	DTAhet
	0.22995	0.10851		19.652	5.05865		4.41732	1.16693		0.11701	0.25572		0.04449	0.04335
	0.19935	0.12933		14.6437	7.13636		3.58713	1.73358		0.1328	0.18835		0.04082	0.04117
	0.1994	0.08145		18.4554	4.18578		3.97997	1.09184		0.13405	0.22668		0.04637	0.03834
	0.24116	0.10072		25.5019	4.50692		5.36268	1.24683		0.11471	0.18025		0.04755	0.03615
	0.23123			23.2924			4.70122			0.12704			0.04955
	0.22221			23.2604			4.91136			0.12504			0.04736
	0.1927			18.7864			4.2448			0.13835			0.04426
	Test details
	Test name	Unpaired t test				P value	Mean of WT	Mean of DTAhet	Difference	SE of difference	t ratio	df
					BMD(g/cm3)	<0.0001	0.2166	0.105	-0.1116	0.01213	9.201	9
					BV/TV(%)	<0.0001	20.51	5.222	-15.29	1.958	7.809	9
					Tb. N(1/mm)	<0.0001	4.458	1.31	-3.148	0.3215	9.79	9
					Tb. Sp(mm)	0.0001	0.127	0.2128	0.08575	0.01347	6.364	9
					Tb. Th(mm)	0.01	0.04577	0.03975	-0.006019	0.001853	3.248	9
Figure 3K
	BMD(g/cm3)			BV/TV(%)			Tb. N(1/mm)			Tb. Sp(mm)			Tb. Th(mm)
	WT	DTAhet		WT	DTAhet		WT	DTAhet		WT	DTAhet		WT	DTAhet
	0.30747	0.12451		24.2748	6.14484		4.33442	1.49531		0.13769	0.24074		0.056	0.04109
	0.33113	0.10211		27.2191	3.88813		4.96254	1.02831		0.12334	0.18124		0.05485	0.03781
	0.31387	0.09526		25.0966	3.82777		4.60217	1.06979		0.12909	0.17503		0.05453	0.03578
	Test details
	Test name	Unpaired t test				P value	Mean of WT	Mean of DTAhet	Difference	SE of difference	t ratio	df
					BMD(g/cm3)	<0.0001	0.3175	0.1073	-0.2102	0.01131	18.58	4
					BV/TV(%)	<0.0001	25.53	4.62	-20.91	1.162	17.99	4
					Tb. N(1/mm)	0.0001	4.633	1.198	-3.435	0.2353	14.6	4
					Tb. Sp(mm)	0.032	0.13	0.199	0.06896	0.02136	3.229	4
					Tb. Th(mm)	0.0005	0.05513	0.03823	-0.0169	0.00161	10.5	4
