# Supplementary material for: Osteocytes regulate senescence of bone and bone marrow
Source: eLife. 2022 Oct 28;11:e81480. doi: 10.7554/eLife.81480 (PMC9678362; doi:10.7554/eLife.81480)
Supplement: Figure 3—figure supplement 1—source data 1. [file elife-81480-fig3-figsupp1-data1.xlsx]

## Sheet: Sheet1
Figure 3 - figure supplement 1A
	Muscle fiber number per field			Test details
	WT	DTAhet		Test name	Unpaired t test
	238	216
	215	290			P value	Mean of WT	Mean of DTAhet	Difference	SE of difference	t ratio	df
	250	224		Muscle fiber number per field	0.8942	228.4	231.8	3.4	24.77	0.1372	8
	175	175
	264	254
Figure 3 - figure supplement 1B
	Muscle fiber number per field			Test details
	WT	DTAhet		Test name	Unpaired t test
	174	235.5
	178	171			P value	Mean of WT	Mean of DTAhet	Difference	SE of difference	t ratio	df
	160	172.5		Muscle fiber number per field	0.082	172.5	195.8	23.25	12.03	1.933	10
	183	225
	178	192
	162	178.5
Figure 3 -figure supplement 1C
	Fold change			Test details
	Cortical bone	Muscle		Test name	Unpaired t test
	1.06161	0.000179274
	0.839663	0.00137188			P value	Mean of cortical bone	Mean of muscle	Difference	SE of difference	t raito	df
	1.12184	0.000126979		Dmp1 expression	0.0003	1.008	0.0005594	-1.007	0.0858	11.74	4
