# Supplementary material for: Osteocytes regulate senescence of bone and bone marrow
Source: eLife. 2022 Oct 28;11:e81480. doi: 10.7554/eLife.81480 (PMC9678362; doi:10.7554/eLife.81480)
Supplement: Figure 3—source data 1. [file elife-81480-fig3-data1.xlsx]

## Sheet: Sheet1
Figure 3B				Figure 3C
	Weight(g)				Gastrcn/mice weight(%)			Test details
	WT	DTAhet			WT	DTAhet		Test name	Unpaired t test
	16.7	10			4.92908	2.92708
	17.4	10.7			4.81933	3.30137			P value	Mean of WT	Mean of DTAhet	Difference	SE of difference	t ratio	df
	17.3	9.9			4.74775	2.60769		Weight(g)	<0.0001	17.19	9.44	-7.748	1.153	6.719	11
	19	10						Gastrcn/mice weight(%)	0.0008	4.832	2.945	-1.887	0.2073	9.102	4
	20	6.6
	19
	14.2
	13.9
Figure 3E
	Myonuclear number per area fiber			Centralized nucleus(%)			Test details
	WT	DTAhet		WT	DTAhet		Test name	Unpaired t test
	12	21		0.420168	16.6667
	14	15		0	14.8276			P value	Mean of WT	Mean of DTAhet	Difference	SE of difference	t ratio	df
	20	14		0	19.6429		Myonuclear number per area fiber	0.5158	11.36	12.64	1.273	1.924	0.6616	20
	13	12		1.71429	26.8571		Centralized nucleus(%)	<0.0001	0.5784	19.3	18.72	2.083	8.986	8
	6	17		0.757576	18.5039
	7	5
	9	8
	15	9
	14	10
	8	11
	7	17
Figure 3G
	Myonuclear number per area fiber			Centralized nucleus(%)			Test details
	WT	DTAhet		WT	DTAhet		Test name	Unpaired t test
	14	13		0.574713	33.758
	15	16		1.1236	22.807			P value	Mean of WT	Mean of DTAhet	Difference	SE of difference	t ratio	df
	19	18		2.5	26.087		Myonuclear number per area fiber	0.6785	13.18	14.27	1.091	2.593	0.4207	20
	5	21		0	23.3333		Centralized nucleus(%)	<0.0001	1.214	26.95	25.74	1.772	14.53	10
	6	22		0	29.6875
	8	19		3.08642	26.0504
	23	15
	24	10
	7	8
	11	9
	13	6
Figure 3H
	Percent survival				Test details
	Week	WT	DTAhet		Test name	Gehan-Breslow-Wilcoxon test
	37		1
	27		1			P value	Median survival of WT	Median survival of DTAhet	Chi square	df
	26		1		Percent survival	0.0047	Undefined	26.5	8	1
	19		1
	37	0
	37	0
	37	0
	37	0
	37	0
