# Supplementary material for: Osteocytes regulate senescence of bone and bone marrow
Source: eLife. 2022 Oct 28;11:e81480. doi: 10.7554/eLife.81480 (PMC9678362; doi:10.7554/eLife.81480)
Supplement: Figure 4—figure supplement 1—source data 1. [file elife-81480-fig4-figsupp1-data1.xlsx]

## Sheet: Sheet1
Figure 4 - figure supplement 1C
	Fold change								Test details
	Gene name	WT			DTAhet				Test name	Multiple t tests
	Alpl	0.797436	1.27625	0.982579	0.247525	0.339137	0.333428
	Bglap	0.893501	1.66553	0.671974	0.164448	0.317683	0.231977		Gene name	Discovery?	P value	Mean of WT	Mean of DTAhet	Difference	SE of difference	t ratio	df	q value
	Col1a1	0.992285	1.4364	0.701596	0.0708138	0.270418	0.230713		Alpl	No	0.00751	1.019	0.3067	0.7121	0.1425	4.996	4	0.010753
	Spp1	0.77631	1.277	1.00873	0.0792659	0.186434	0.137537		Bglap	No	0.051042	1.077	0.238	0.839	0.3044	2.756	4	0.045109
	Sp7	1.05103	1.07379	0.886065	0.209514	0.354595	0.332431		Col1a1	No	0.018491	1.043	0.1906	0.8528	0.2222	3.838	4	0.021789
	Runx2	0.837467	1.53792	0.776423	0.137445	0.213685	0.175473		Spp1	No	0.003904	1.021	0.1344	0.8863	0.1479	5.991	4	0.010753
	Dmp1	1.03207	0.848632	1.14175	0.0416879	0.395266	0.290083		Sp7	Yes	0.000693	1.004	0.2988	0.7048	0.07439	9.474	4	0.004897
	Sost	1.19376	1.07642	0.778217	0.161969	0.272614	0.430489		Runx2	No	0.023427	1.051	0.1755	0.8751	0.2453	3.568	4	0.023661
									Dmp1	No	0.004815	1.007	0.2423	0.7651	0.1353	5.656	4	0.010753
									Sost	No	0.007605	1.016	0.2884	0.7278	0.1462	4.979	4	0.010753
Figure 4 - figure supplement 1H
	OCP(%)			Test details
	WT	DTAhet		Test name	Unpaired t test
	1.7	1.99
	1.77	1.96			P value	Mean of WT	Mean of DTAhet	Difference	SE of difference	t ratio	df
	1.54	2.21		OCP(%)	0.0154	1.705	2.053	0.3483	0.0964	3.611	5
	1.81
