# Supplementary material for: Osteocytes regulate senescence of bone and bone marrow
Source: eLife. 2022 Oct 28;11:e81480. doi: 10.7554/eLife.81480 (PMC9678362; doi:10.7554/eLife.81480)
Supplement: Figure 4—source data 1. [file elife-81480-fig4-data1.xlsx]

## Sheet: Sheet1
Figure 4B
	N.Ob/BS(/mm)			OS/BS(%)			Test details
	WT	DTAhet		WT	DTAhet		Test name	Unpaired t test
	91.2435	64.0323		46.2086	14.2741
	87.8171	47.5212		44.6246	33.9596			P value	Mean of WT	Mean of DTAhet	Difference	SE of difference	t ratio	df
	95.2555	53.4234		47.0187	36.634		N.Ob/BS(/mm)	0.0002	97.65	63.28	-34.37	5.895	5.83	10
	115.399	74.2004		51.0654	21.2425		OS/BS(%)	0.0024	50.61	28.58	-22.03	5.47	4.027	10
	101.31	70.2661		70.5929	31.6063
	94.8934	70.2644		44.164	33.7791
Figure 4D
	Ad.V/TV(%)			Test details
	WT	DTAhet		Test name	Unpaired t test
	0.3658	1.6064
	0.6549	2.5799			P value	Mean of WT	Mean of DTAhet	Difference	SE of difference	t ratio	df
	0.1722	1.1042		Ad.V/TV(%)	0.0001	0.4745	1.741	1.266	0.2141	5.916	10
	0.4785	1.6576
	0.7768	1.6882
	0.3987	1.8093
Figure 4F
	MS/BS(%)			MAR(μm/d)			BFR/BS(μm3/μm2/d)			Test details
	WT	DTAhet		WT	DTAhet		WT	DTAhet		Test name	Unpaired t test
	44.6901	35.5988		1.21843	0.987809		0.534974	0.351648
	46.0109	36.3031		1.64999	1.04134		1.25055	0.465377			P value	Mean of WT	Mean of DTAhet	Difference	SE of difference	t ratio	df
	75.7916	43.8478		1.74899	0.914826		1.65763	0.401131		MS/BS(%)	0.0442	57.33	37.85	-19.48	7.677	2.538	6
	62.8277	35.6425		1.35807	1.16271		0.853244	0.434279		MAR(μm/d)	0.0132	1.494	1.027	-0.4672	0.1343	3.478	6
										BFR/BS(μm3/μm2/d)	0.0355	1.074	0.4131	-0.661	0.2446	2.702	6
Figure 4G
	P1NP(ng/mL)			Test details
	WT	DTAhet		Test name	Unpaired t test
	63.23	40.58
	50.94	61.67			P value	Mean of WT	Mean of DTAhet	Difference	SE of difference	t ratio	df
	78.93	40.01		P1NP(ng/mL)	0.0061	73.12	50.6	-22.52	6.653	3.385	11
	82.72	38.18
	79.6	61.96
	83.29	51.54
		60.23
Figure 4J
	Fold change								Test details
	Gene name	WT			DTAhet				Test name	Multiple t tests
	Alpl	1.17789	1.25047	0.678922	0.105518	0.0404058	0.00731336
	Bglap	0.826805	1.76185	0.68648	0.0628266	0.0283082	0.00404821		Gene name	Discovery?	P value	Mean of WT	Mean of DTAhet	Difference	SE of difference	t ratio	df	q value
	Col1a1	1.16773	1.20667	0.70969	0.157693	0.0366086	0.00967603		Alpl	No	0.005647	1.036	0.05108	0.9847	0.1819	5.412	4	0.011618
	Spp1	1.28352	1.03846	0.750252	0.247595	0.0923012	0.0252738		Bglap	No	0.034962	1.092	0.03173	1.06	0.3379	3.137	4	0.042374
	Sp7	1.0595	1.6572	0.569539	0.361326	0.228434	0.286818		Col1a1	No	0.004434	1.028	0.06799	0.96	0.1659	5.786	4	0.011618
	Runx2	1.23062	1.25916	0.645347	0.173344	0.0522582	0.00730089		Spp1	No	0.005752	1.024	0.1217	0.9024	0.1676	5.384	4	0.011618
									Sp7	No	0.064314	1.095	0.2922	0.8032	0.3168	2.535	4	0.064957
									Runx2	No	0.009346	1.045	0.07763	0.9674	0.2061	4.695	4	0.01416
Figure 4L
	Oc.S/BS(%)			N. Oc/BS(/mm)			Test details
	WT	DTAhet		WT	DTAhet		Test name	Unpaired t test
	21.73	46.4387		8.63438	24.7882
	10.3638	57.798		4.76837	18.4688			P value	Mean of WT	Mean of DTAhet	Difference	SE of difference	t ratio	df
	8.6461	46.3141		3.3158	17.4864		Oc.S/BS(%)	0.0013	18.32	44.61	26.29	5.92	4.441	10
	24.6411	57.5221		7.949	26.0937		N. Oc/BS(/mm)	0.002	6.686	18.18	11.49	2.781	4.131	10
	19.1187	31.5225		6.99088	11.9994
	25.4314	28.0746		8.45701	10.2207
Figure 4M
	RANKL(ng/mL)			OPG(ng/mL)			RANKL/OPG			Test details
	WT	DTAhet		WT	DTAhet		WT	DTAhet		Test name	Unpaired t test
	90.87	89.46		838.46	810.55		0.110079	0.110369
	89.41	106.16		920.85	705.33		0.116387	0.158498			P value	Mean of WT	Mean of DTAhet	Difference	SE of difference	t ratio	df
	81.35	119.71		609.95	539.2		0.106638	0.209283		RANKL(ng/mL)	0.008	92.76	109.2	16.47	5.1	3.229	11
	99.49	104.12		791	677.86		0.088345	0.194778		OPG(ng/mL)	0.0259	803.3	652.7	-150.6	58.51	2.574	11
	98.37	112.79		825.48	714.43		0.163105	0.193104		RANKL/OPG	0.0075	0.1182	0.1716	0.05344	0.01637	3.264	11
	97.08	120.56		834.14	507.26		0.12436	0.166388
		111.79			614.58			0.168744
Figure 4N
	CTX(ng/mL)			Test details
	WT	DTAhet		Test name	Unpaired t test
	3.54	3.39
	3.07	4			P value	Mean of WT	Mean of DTAhet	Difference	SE of difference	t ratio	df
	2.24	4.09		CTX(ng/mL)	0.0068	2.452	3.619	1.167	0.3511	3.324	11
	1.81	3.74
	1.94	4.01
	2.11	3.66
		2.44
Figure 4P
	TRAP+ MNCs (number/well)			Test details
	WT	DTAhet		Test name	Unpaired t test
	11	45
	22	42			P value	Mean of WT	Mean of DTAhet	Difference	SE of difference	t ratio	df
	18	41		TRAP+ MNCs (number/well)	0.0017	17	42.67	25.67	3.432	7.479	4
Figure 4Q
	Fold change								Test details
	Gene name	WT			DTAhet				Test name	Multiple t tests
	Acp5	1.01382	0.943952	1.04493	2.79249	2.04518	2.11395
	Calcr	1.02258	0.934064	1.04695	2.74924	2.15578	2.17142		Gene name	Discovery?	P value	Mean of WT	Mean of DTAhet	Difference	SE of difference	t ratio	df	q value
	Ocstamp	1.0273	0.946616	1.02832	2.04812	1.55995	1.61362		Acp5	No	0.005409	1.001	2.317	-1.316	0.2403	5.477	4	0.013352
	Atp6v0d2	1.02604	0.935286	1.04205	2.38446	1.68687	1.84173		Calcr	No	0.00238	1.001	2.359	-1.358	0.1983	6.848	4	0.012019
	Tyrobp	1.01106	0.933528	1.05949	1.9761	1.41157	1.38868		Ocstamp	No	0.009206	1.001	1.741	-0.7398	0.1569	4.715	4	0.013352
									Atp6v0d2	No	0.010576	1.001	1.971	-0.9699	0.2141	4.53	4	0.013352
									Tyrobp	No	0.039141	1.001	1.592	-0.5908	0.1956	3.021	4	0.039532
