# Supplementary material for: Osteocytes regulate senescence of bone and bone marrow
Source: eLife. 2022 Oct 28;11:e81480. doi: 10.7554/eLife.81480 (PMC9678362; doi:10.7554/eLife.81480)
Supplement: Figure 5—figure supplement 2—source data 1. [file elife-81480-fig5-figsupp2-data1.xlsx]

## Sheet: Sheet1
Figure 5 - figure supplement 2B
	HSC(%)			Test details
	WT	DTAhet		Test name	Unpaired t test
	12.6	15.8
	13	13.7			P value	Mean of WT	Mean of DTAhet	Difference	SE of difference	t ratio	df
	14.9	15		HSC(%)	0.1635	13.55	14.83	1.283	0.7861	1.633	5
	13.7
Figure 5 - figure supplement 2D
	LT-HSC(%)			ST-HSC(%)			Test details
	WT	DTAhet		WT	DTAhet		Test name	Unpaired t test
	93.9	88.1		5.63	12.1
	93.1	90.8		6.1	7.26			P value	Mean of WT	Mean of DTAhet	Difference	SE of difference	t ratio	df
	93.8	92.1		6.18	8.9		LT-HSC(%)	0.0331	93.38	90.33	-3.042	1.042	2.918	5
	92.7			7			ST-HSC(%)	0.0492	6.228	9.42	3.193	1.236	2.583	5
Figure 5 - figure supplement 2F
	cMoP(%)			Test details
	WT	DTAhet		Test name	Unpaired t test
	10.2	15.7
	9.83	21.2			P value	Mean of WT	Mean of DTAhet	Difference	SE of difference	t ratio	df
	14.4	15.5		cMoP(%)	0.0278	11.36	17.47	6.109	1.991	3.068	5
	11
Figure 5 - figure supplement 2H
	CD11b+Ly-6C+(%)			Test details
	WT	DTAhet		Test name	Unpaired t test
	22.4	31.9
	21	31.7			P value	Mean of WT	Mean of DTAhet	Difference	SE of difference	t ratio	df
	24.7	33.5		CD11b+Ly-6C+(%)	0.0004	22.08	32.37	10.29	1.26	8.165	5
	20.2
Figure 5 - figure supplement 2J
	CLP(%)			Test details
	WT	DTAhet		Test name	Unpaired t test
	13.6	17.3
	13.4	13.9			P value	Mean of WT	Mean of DTAhet	Difference	SE of difference	t ratio	df
	14.4	14.5		CLP(%)	0.2262	13.95	15.23	1.283	0.9302	1.38	5
	14.4
