# Supplementary material for: Osteocytes regulate senescence of bone and bone marrow
Source: eLife. 2022 Oct 28;11:e81480. doi: 10.7554/eLife.81480 (PMC9678362; doi:10.7554/eLife.81480)
Supplement: Figure 5—source data 1. [file elife-81480-fig5-data1.xlsx]

## Sheet: Sheet1
Figure 5J
	CMP(%)			GMP(%)			MEP(%)			Test details
	WT	DTAhet		WT	DTAhet		WT	DTAhet		Test name	Unpaired t test
	29.9	48.3		4.73	11.4		62.8	38.3
	34.7	48.8		6.81	14.7		55.4	34.6			P value	Mean of WT	Mean of DTAhet	Difference	SE of difference	t ratio	df
	36.8	41.6		7.09	9.63		54.1	46		CMP(%)	0.0049	32.95	46.23	13.28	2.775	4.786	5
	30.4			5.1			61.9			GMP(%)	0.0086	5.933	11.91	5.978	1.429	4.184	5
										MEP(%)	0.0044	58.65	39.63	-18.92	3.844	4.921	5
Figure 5L
	CD11b+(%)			Test details
	WT	DTAhet		Test name	Unpaired t test
	34	52
	41.3	54.8			P value	Mean of WT	Mean of DTAhet	Difference	SE of difference	t ratio	df
	34.3	54		CD11b+(%)	0.0025	36.53	53.6	17.07	2.526	6.756	4
Figure 5N
	CD11b+Ly-6G+(%)			Test details
	WT	DTAhet		Test name	Unpaired t test
	36	47.1
	39.6	49.6			P value	Mean of WT	Mean of DTAhet	Difference	SE of difference	t ratio	df
	46.8	49.7		CD11b+Ly-6G+(%)	0.0294	40.3	48.8	8.5	2.813	3.022	5
	38.8
Figure 5P
	B220+(%)			Test details
	WT	DTAhet		Test name	Unpaired t test
	30.8	16.8
	28.2	9.9			P value	Mean of WT	Mean of DTAhet	Difference	SE of difference	t ratio	df
	31.5	14.2		B220+(%)	0.0018	30.17	13.63	-16.53	2.248	7.353	4
Figure 5R
	ProB PreB(%)			Immature B(%)			Transitional B(%)			Early mature B(%)			Late mature B(%)			Test details
	WT	DTAhet		WT	DTAhet		WT	DTAhet		WT	DTAhet		WT	DTAhet		Test name	Unpaired t test
	67.4	52		8.43	5.63		10.8	6.71		5.57	11.4		7.1	18.2
	57.9	27.8		8.74	3.44		7.77	5.5		9.06	20.6		7.71	32.4			P value	Mean of WT	Mean of DTAhet	Difference	SE of difference	t ratio	df
	61	37.2		8.48	3.85		8.79	5.46		6.6	18		11.2	28.3		ProB PreB(%)	0.0134	63.3	39	-24.3	6.498	3.74	5
	66.9			8.22			7.95			4.78			7.44			Immature B(%)	0.0008	8.468	4.307	-4.161	0.5764	7.218	5
																Transitional B(%)	0.0215	8.828	5.89	-2.938	0.89	3.3	5
																Early mature B(%)	0.0103	6.503	16.67	10.16	2.542	3.999	5
																Late mature B(%)	0.0047	8.363	26.3	17.94	3.706	4.84	5
