# Supplementary material for: Osteocytes regulate senescence of bone and bone marrow
Source: eLife. 2022 Oct 28;11:e81480. doi: 10.7554/eLife.81480 (PMC9678362; doi:10.7554/eLife.81480)
Supplement: Figure 6—figure supplement 1—source data 1. [file elife-81480-fig6-figsupp1-data1.xlsx]

## Sheet: Sheet1
Figure 6 - figure supplement 1F
	Fold change								Test details
	Gene name	WT			DTAhet				Test name	Multiple t tests
	Adipoq	1.0335	0.929809	1.04063	92.2046	82.1001	92.8646
	Fabp4	0.733275	1.10307	1.23631	110.166	146.992	122.826		Gene name	Discovery?	P value	Mean of WT	Mean of DTAhet	Difference	SE of difference	t ratio	df	q value
	Pparg	0.843423	1.22504	0.967844	17.6843	14.1996	18.116		Adipoq	Yes	1.5e-05	1.001	89.06	-88.06	3.484	25.28	4	5.9e-05
	Cebpa	0.7678	1.1971	1.08798	6.90046	11.6452	7.25698		Fabp4	Yes	0.000312	1.024	126.7	-125.6	10.8	11.63	4	0.000421
									Pparg	Yes	0.00023	1.012	16.67	1.245	1.245	12.57	4	0.000421
									Cebpa	Yes	0.007745	1.018	8.601	1.531	1.531	4.953	4	0.007823
Figure 6 - figure supplement 1G
	Fold change								Test details
	Gene name	WT			DTAhet				Test name	Multiple t tests
	Col1a2	2.3593	0.639449	0.662843	0.735544	0.672901	0.480262
	Acan	1.43636	0.367797	1.89291	2.60184	1.49723	2.35167		Gene name	Discovery?	P value	Mean of WT	Mean of DTAhet	Difference	SE of difference	t ratio	df	q value
	Sox9	1.24376	0.825022	0.974532	1.07581	0.753542	2.51118		Col1a2	No	0.361836	1.221	0.6296	0.591	0.5746	1.029	4	0.424061
	Prg4	1.35603	0.768527	0.959559	0.856854	0.709396	0.431164		Acan	No	0.177868	1.232	2.15	-0.9179	0.5622	1.633	4	0.359293
	Mmp3	0.695172	0.600544	2.39531	4.85499	1.98065	5.29561		Sox9	No	0.478666	1.014	1.447	-0.4324	0.554	0.7806	4	0.483452
	Mmp13	1.3144	0.520108	1.46278	1.67208	1.04422	1.67888		Prg4	No	0.164748	1.028	0.6658	0.3622	0.2133	1.698	4	0.359293
	Adamts1	1.21299	0.834874	0.987466	2.22869	1.27316	1.35276		Mmp3	No	0.077604	1.23	4.044	-2.813	1.192	2.361	4	0.359293
	Adamts5	0.915216	0.720707	1.51606	0.976843	1.61138	1.54383		Mmp13	No	0.367379	1.099	1.465	-0.366	0.3604	1.015	4	0.424061
									Adamts1	No	0.13566	1.012	1.618	-0.6064	0.3252	1.865	4	0.359293
									Adamts5	No	0.35513	1.051	1.377	-0.3267	0.3127	1.045	4	0.424061
