# Supplementary material for: Osteocytes regulate senescence of bone and bone marrow
Source: eLife. 2022 Oct 28;11:e81480. doi: 10.7554/eLife.81480 (PMC9678362; doi:10.7554/eLife.81480)
Supplement: Figure 6—source data 1. [file elife-81480-fig6-data1.xlsx]

## Sheet: Sheet1
Figure 6C
	TNF-𝛼(pg/mL)			IL-1β(pg/mL)			IL-6(pg/mL)			Test details
	WT	DTAhet		WT	DTAhet		WT	DTAhet		Test name	Unpaired t test
	337.46	464.06		63.52	71.16		45.47	83.41
	265.07	390.46		47.78	54.95		27.46	68.76			P value	Mean of WT	Mean of DTAhet	Difference	SE of difference	t ratio	df
	352.14	344.15		75.7	85.25		52.94	68.87		TNF-𝛼(pg/mL)	0.0145	320.7	400.2	79.41	26.31	3.018	9
	343.89	374.12		56.76	77.55		57.43	79.53		IL-1β(pg/mL)	0.0306	58.28	78.86	20.58	8.034	2.562	9
	305.13	372.39		47.62	93.15		34.27	72.97		IL-6(pg/mL)	0.0005	43.51	74.02	30.5	5.764	5.292	9
		455.72			91.09			70.55
Figure 6I
	Fold change								Test details
	Gene name	WT			DTAhet				Test name	Multiple t tests
	Cdkn2a	0.640495	0.791871	1.97165	9.57056	7.18234	2.72829
	Cdkn1a	0.563794	1.4709	1.20586	23.9618	21.9074	7.45732		Gene name	Discovery?	P value	Mean of WT	Mean of DTAhet	Difference	SE of difference	t ratio	df	q value
	Tnf	1.02234	1.55555	0.628813	10.2352	6.92573	2.51711		Cdkn2a	No	0.059053	1.135	6.494	-5.359	2.049	2.616	4	0.09005
	Il1b	1.07286	0.440256	2.11715	5.45013	6.00766	2.66584		Cdkn1a	No	0.03257	1.08	17.78	-16.7	5.2	3.211	4	0.09005
	Ccl2	0.692511	0.878906	1.64297	8.61168	4.07214	1.09318		Tnf	No	0.071327	1.069	6.559	-5.49	2.252	2.438	4	0.09005
									Il1b	No	0.037694	1.21	4.708	-3.498	1.143	3.059	4	0.09005
									Ccl2	No	0.185585	1.071	4.592	-3.521	2.205	1.597	4	0.187441
Figure 6J
	Fold change								Test details
	Gene name	WT			DTAhet				Test name	Multiple t tests
	Cdkn2a	1.98622	1.1654	0.432014	3.64565	2.36687	3.8285
	Cdkn1a	0.925419	1.1838	0.912819	1.40237	1.23922	1.69218		Gene name	Discovery?	P value	Mean of WT	Mean of DTAhet	Difference	SE of difference	t ratio	df	q value
	Tnf	1.02044	0.718312	1.36427	2.91909	2.23294	7.01303		Cdkn2a	No	0.031494	1.195	3.28	-2.086	0.6426	3.246	4	0.079523
	Il1b	1.31694	0.768867	0.987603	3.26452	1.49642	4.83743		Cdkn1a	No	0.051548	1.007	1.445	-0.4372	0.1592	2.747	4	0.086772
	Ccl2	2.49707	0.871137	0.459708	4.54278	4.96466	5.37923		Tnf	No	0.114975	1.034	4.055	-3.021	1.504	2.009	4	0.116125
									Il1b	No	0.090235	1.024	3.199	-2.175	0.9781	2.224	4	0.113922
									Ccl2	No	0.005242	1.276	4.962	-3.686	0.6672	5.525	4	0.026474
