# Supplementary material for: Osteocytes regulate senescence of bone and bone marrow
Source: eLife. 2022 Oct 28;11:e81480. doi: 10.7554/eLife.81480 (PMC9678362; doi:10.7554/eLife.81480)
Supplement: Supplementary file 1. [file elife-81480-supp1.xlsx]

## Sheet: Table1
GO enrichement
GO_ID	GO_Term	GO_function	GO_class	Genes	S gene number	TS gene number	B gene number	TB gene number	pvalue
GO:0001503	ossification	biological_process	4	ENSMUSG00000029755;ENSMUSG00000025491;ENSMUSG00000018924;ENSMUSG00000001494;ENSMUSG00000032496;ENSMUSG00000000435;ENSMUSG00000001506;ENSMUSG00000001348;ENSMUSG00000046714;ENSMUSG00000050295;ENSMUSG00000058806;ENSMUSG00000014599;ENSMUSG00000026459;ENSMUSG00000006538;ENSMUSG00000039153;ENSMUSG00000028108;ENSMUSG00000022483;ENSMUSG00000048583;ENSMUSG00000000957;ENSMUSG00000052276;ENSMUSG00000028469;…	23	65	35	2193	6.28991e-29
GO:0001649	osteoblast differentiation	biological_process	6	ENSMUSG00000050199;ENSMUSG00000023000;ENSMUSG00000029816;ENSMUSG00000005583;ENSMUSG00000039153;ENSMUSG00000025407;ENSMUSG00000029755;ENSMUSG00000024330;ENSMUSG00000027833;ENSMUSG00000060284;ENSMUSG00000001506;ENSMUSG00000048402;ENSMUSG00000026185;ENSMUSG00000006958;ENSMUSG00000006538;ENSMUSG00000042821;ENSMUSG00000048583	17	65	24	2193	3.36432e-22
GO:0045669	positive regulation of osteoblast differentiation	biological_process	8	ENSMUSG00000024913;ENSMUSG00000025491;ENSMUSG00000035914;ENSMUSG00000001802;ENSMUSG00000029755;ENSMUSG00000022996;ENSMUSG00000039153;ENSMUSG00000019359;ENSMUSG00000022510;ENSMUSG00000032496;ENSMUSG00000040998;ENSMUSG00000025854;ENSMUSG00000005583	13	65	19	2193	9.26247e-17
GO:0001958	endochondral ossification	biological_process	6	ENSMUSG00000028766;ENSMUSG00000001506;ENSMUSG00000031906;ENSMUSG00000005583;ENSMUSG00000058806;ENSMUSG00000000957;ENSMUSG00000039153;ENSMUSG00000050295;ENSMUSG00000022483;ENSMUSG00000029755	10	65	12	2193	1.62407e-14
GO:0060349	bone morphogenesis	biological_process	6	ENSMUSG00000039910;ENSMUSG00000029755;ENSMUSG00000022367;ENSMUSG00000024940;ENSMUSG00000072945;ENSMUSG00000024913;ENSMUSG00000001348;ENSMUSG00000032496;ENSMUSG00000006457	9	65	12	2193	2.06182e-12
GO:0048705	skeletal system morphogenesis	biological_process	6	ENSMUSG00000038692;ENSMUSG00000001506;ENSMUSG00000022483;ENSMUSG00000044042;ENSMUSG00000040711;ENSMUSG00000024330;ENSMUSG00000024620;ENSMUSG00000040310;ENSMUSG00000064325;ENSMUSG00000039153	10	65	18	2193	9.36869e-12
GO:0030282	bone mineralization	biological_process	7	ENSMUSG00000031906;ENSMUSG00000029816;ENSMUSG00000018924;ENSMUSG00000050199;ENSMUSG00000032492;ENSMUSG00000043207	6	65	6	2193	5.38329e-10
GO:0002076	osteoblast development	biological_process	6	ENSMUSG00000024913;ENSMUSG00000039153;ENSMUSG00000048402;ENSMUSG00000038331;ENSMUSG00000032492;ENSMUSG00000029915	6	65	7	2193	3.68117e-09
GO:0046849	bone remodeling	biological_process	5	ENSMUSG00000049511;ENSMUSG00000003070;ENSMUSG00000050199;ENSMUSG00000024913;ENSMUSG00000024940	5	65	5	2193	1.96311e-08
GO:0060351	cartilage development involved in endochondral bone morphogenesis	biological_process	7	ENSMUSG00000014158;ENSMUSG00000022483;ENSMUSG00000001506;ENSMUSG00000027833	4	65	4	2193	7.04466e-07
GO:0043931	ossification involved in bone maturation	biological_process	5	ENSMUSG00000053646;ENSMUSG00000036862;ENSMUSG00000030592	3	65	3	2193	2.48835e-05
GO:0048539	bone marrow development	biological_process	6	ENSMUSG00000026395;ENSMUSG00000038692;ENSMUSG00000024913	3	65	4	2193	9.74208e-05
GO:1900159	positive regulation of bone mineralization involved in bone maturation	biological_process	9	ENSMUSG00000006457;ENSMUSG00000032496	2	65	2	2193	0.000865395
