# Supplementary material for: Osteocytes regulate senescence of bone and bone marrow
Source: eLife. 2022 Oct 28;11:e81480. doi: 10.7554/eLife.81480 (PMC9678362; doi:10.7554/eLife.81480)
Supplement: Supplementary file 2. [file elife-81480-supp2.xlsx]

## Sheet: Table2
Gene sets used in this study
Necroptosis	Chemotaxis	Glycolysis	Neutrophil activation)	SASP
Trpm7	C5ar1	Hk1	Abr	Ang
Tnf	Ccl1	Hk2	Ptafr	Areg
Mlkl	Ccl11	Hkdc1	Tyrobp	Axl
rbck1	Ccl12	Gpi1	Stx11	Bmp2
Cyld	Ccl17	Pfkl	Bcr	Bmp6
Cav1	Ccl19	Pfkm	Syk	Ccl1
Rnf31	Ccl2	Aldoa	Vamp7	Ccl13
Ppif	Ccl20	Tpi1	Dnase1	Ccl2
Peli1	Ccl21a	Gapdh	Dnase1l3	Ccl20
Fadd	Ccl21b	Pgk1	Fcer1g	Ccl25
Ripk3	Ccl21c	Pgam1	Pram1	Ccl26
Trp53	Ccl22	Pgam2	Itgb2	Ccl3
Birc3	Ccl24	Eno1	Itgam	Ccl7
Bok	Ccl25	Eno2	Cd177	Cd55
Ripk1	Ccl26	Pklr	Anxa3	Cd9
Tlr3	Ccl3	Pkm	Myo1f	Csf1
Ipmk	Ccl4			Csf2
Birc2	Ccl5			Csf2rb
Spata2	Ccl6			Csf3
Map3k7	Ccl7			Cxcl1
Fas	Ccl8			Cxcl11
Cflar	Ccl9			Cxcl12
Fasl	Cklf			Cxcl2
Slc25a4	Csf3r			Cxcl3
Casp8	Cx3cl1			Cxcl5
Pgam5	Cxadr			Cxcl6
Dnm1l	Cxcl1			Cxcl8
Ybx3	Cxcl10			Ereg
Pygl	Cxcl13			Ets2
Itpk1	Cxcl15			Fas
	Cxcl2			Fgf2
	Cxcl3			Fgf7
	Cxcl5			Gdf15
	Cxcl9			Gem
	Cxcr1			Gmfg
	Cxcr2			Hgf
	Edn3			Icam1
	Fcer1g			Icam3
	Fcgr3			Igf1
	Gbf1			Igf2R
	Gm2564			Igfbp1
	Ifng			Igfbp2
	Il17b			Igfbp6
	Il1b			Il13
	Il1f10			Il15
	Il1rn			Il1a
	Itga1			Il1b
	Itga9			Il6
	Itgam			Il6st
	Itgb2			Il7
	Lgals3			Inha
	Nckap1l			Inhba
	Pde4b			Iqgap1
	Pde4d			Itga2
	Pf4			Itpka
	Pla2g1b			Jun
	Ppbp			Mif
	Prex1			Mmp1
	Prkca			Mmp10
	S100a8			Mmp12
	S100a9			Mmp13
	Slc37a4			Mmp14
	Spp1			Mmp2
	Syk			Mmp3
	Tgfb2			Mmp7
	Trem1			Mmp9
	Trem3			Ngf
	Vav1			PIgf
	Vav3			Plaur
	Xcl1			Ptges
				Rps6ka5
				Serpinb2
				Serpine1
				Tgfb1
				Timp1
				Timp2
				Tnfrsf10c
				Tnfrsf11b
				Tnfrsf1a
				Tnfrsf1b
				Vegfa
				Vegfc
				Wnt2
