# Supplementary figures and images for: Osteocytes regulate senescence of bone and bone marrow
Source: eLife journal article supplement (doi:10.7554/elife.81480), 2022-10-28

**Figure 5 - figure supplement 2**

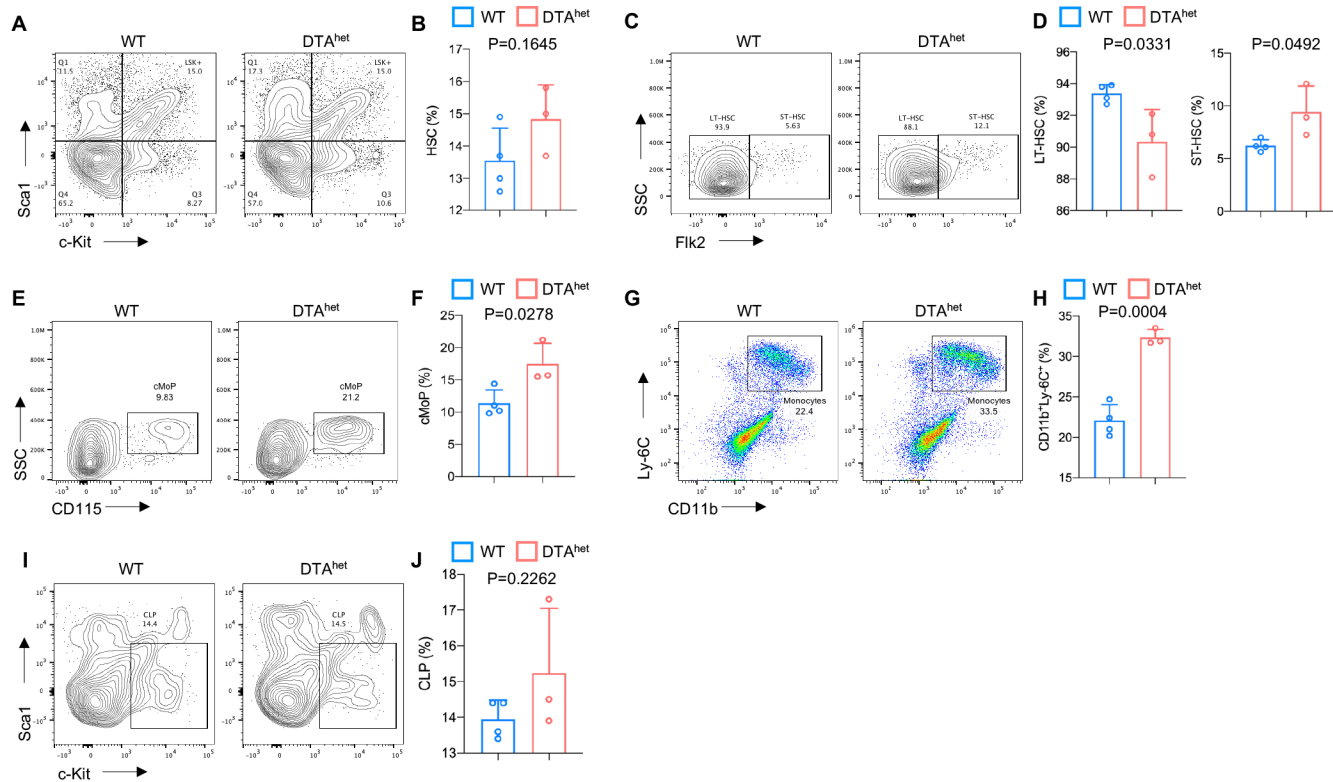

Supplement: supp [file elife-81480-supp-v1.zip]

**Figure 2 - figure supplement 2**

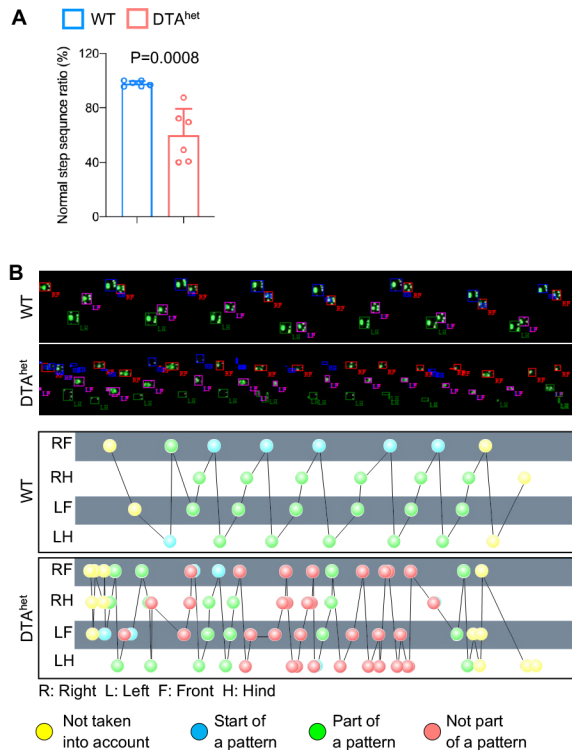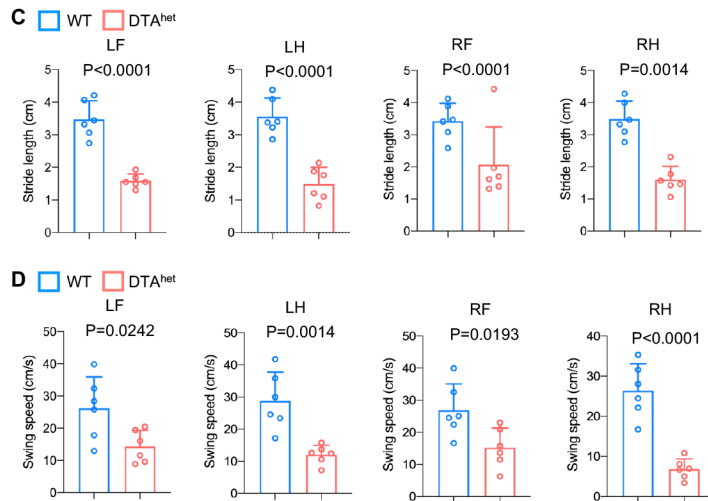

Supplement: supp [file elife-81480-supp-v1.zip]

**Figure 4 - figure supplement 1**

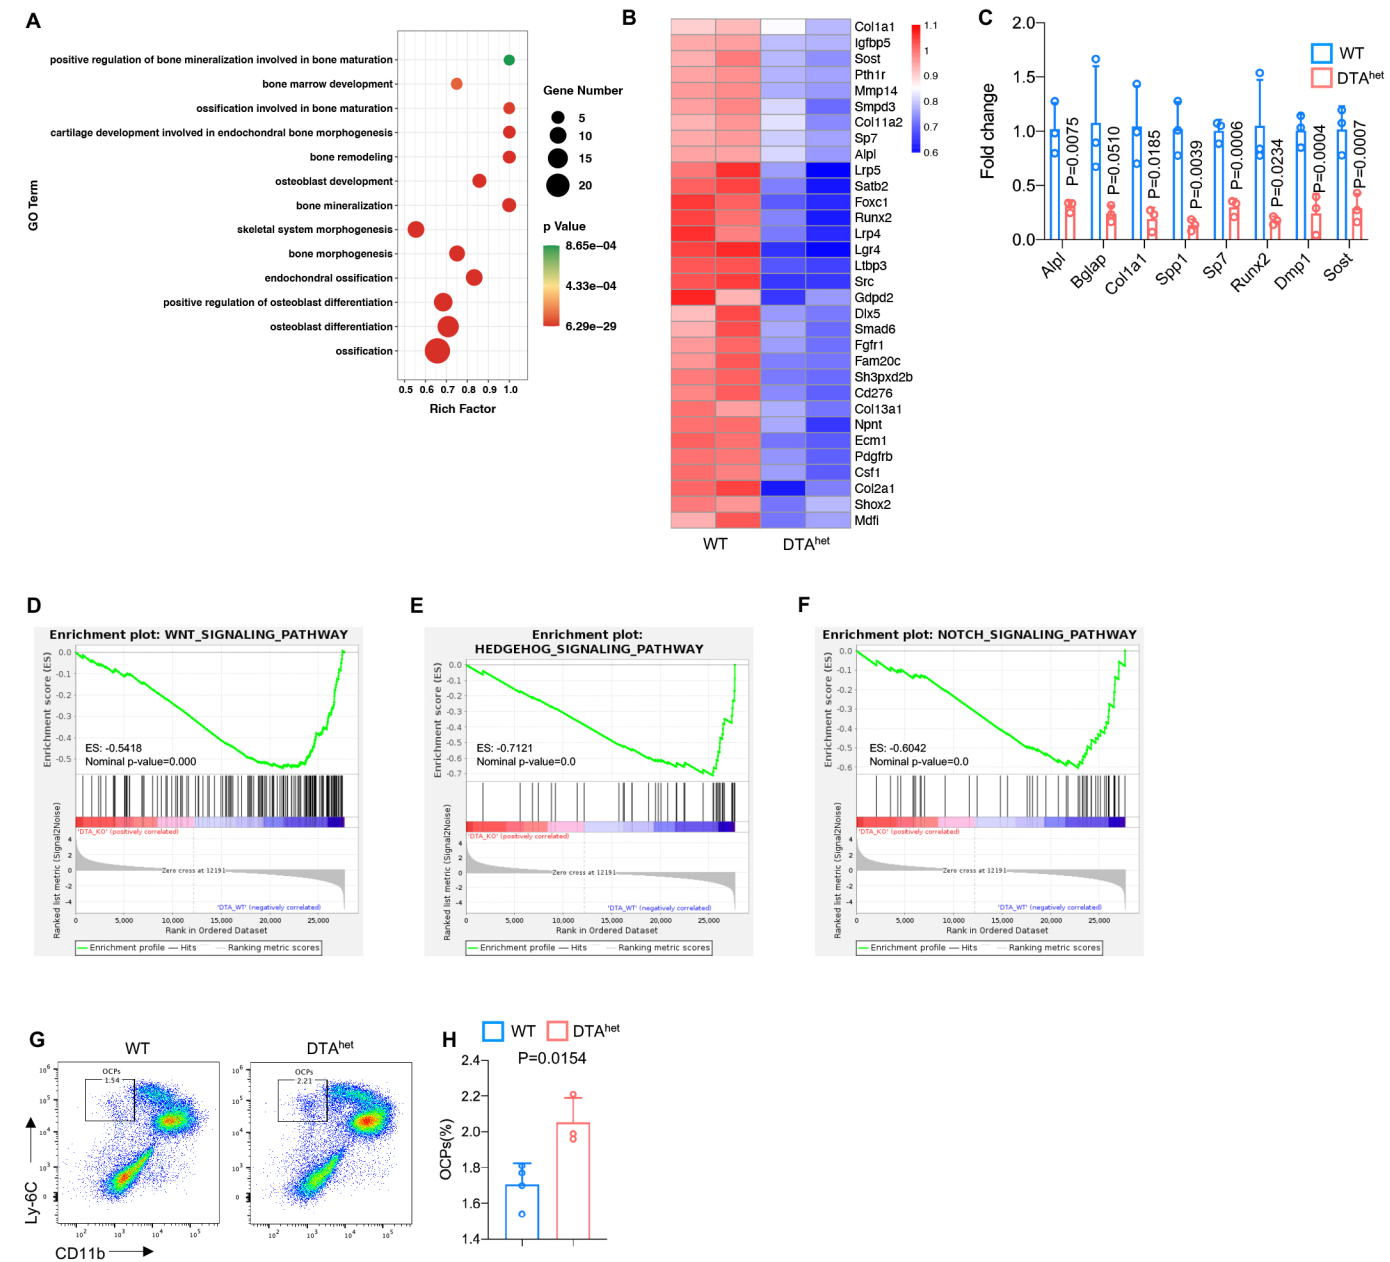

Supplement: supp [file elife-81480-supp-v1.zip]

**Figure 3 - figure supplement 1**

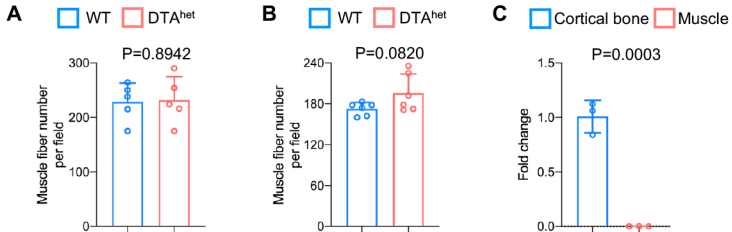

Supplement: supp [file elife-81480-supp-v1.zip]

**Figure 6 - figure supplement 1**

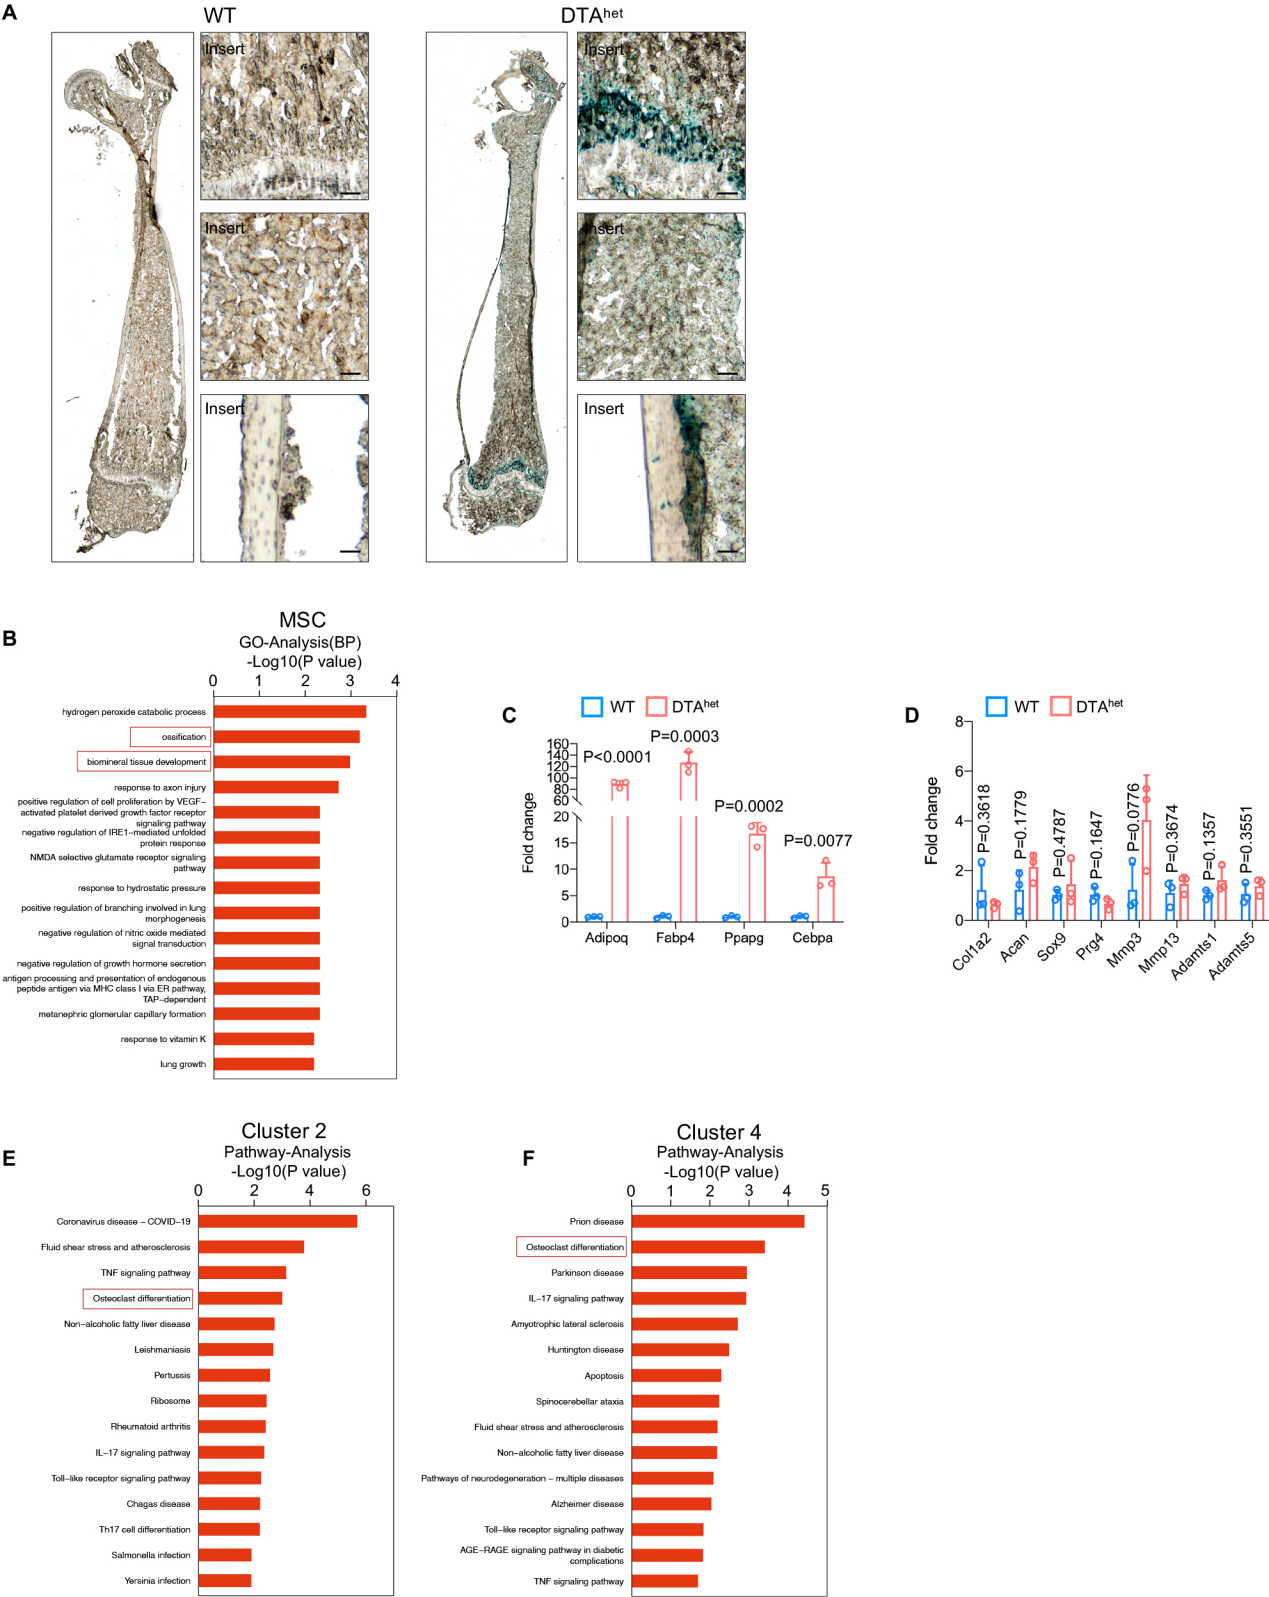

Supplement: supp [file elife-81480-supp-v1.zip]

**Figure 1 - figure supplement 1**

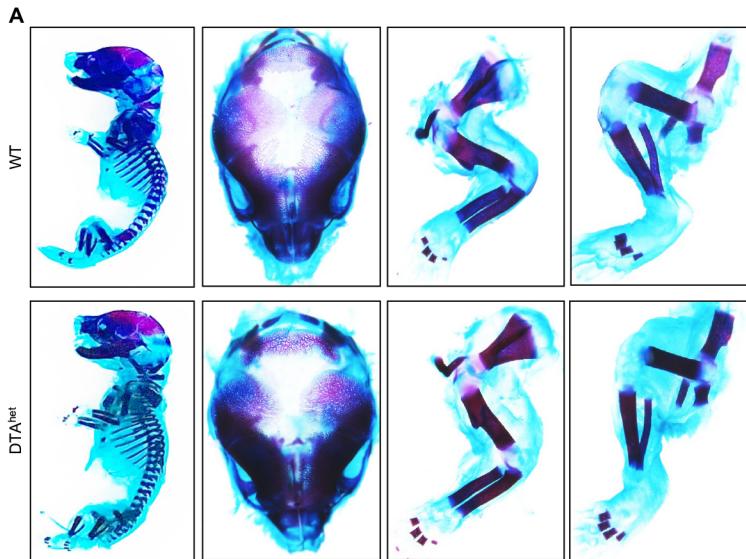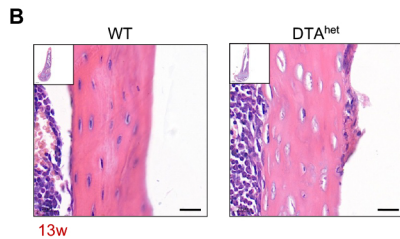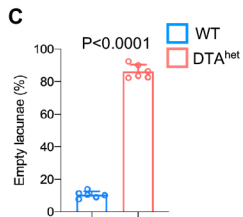

Supplement: supp [file elife-81480-supp-v1.zip]

Figure 5 - figure supplement 1

A

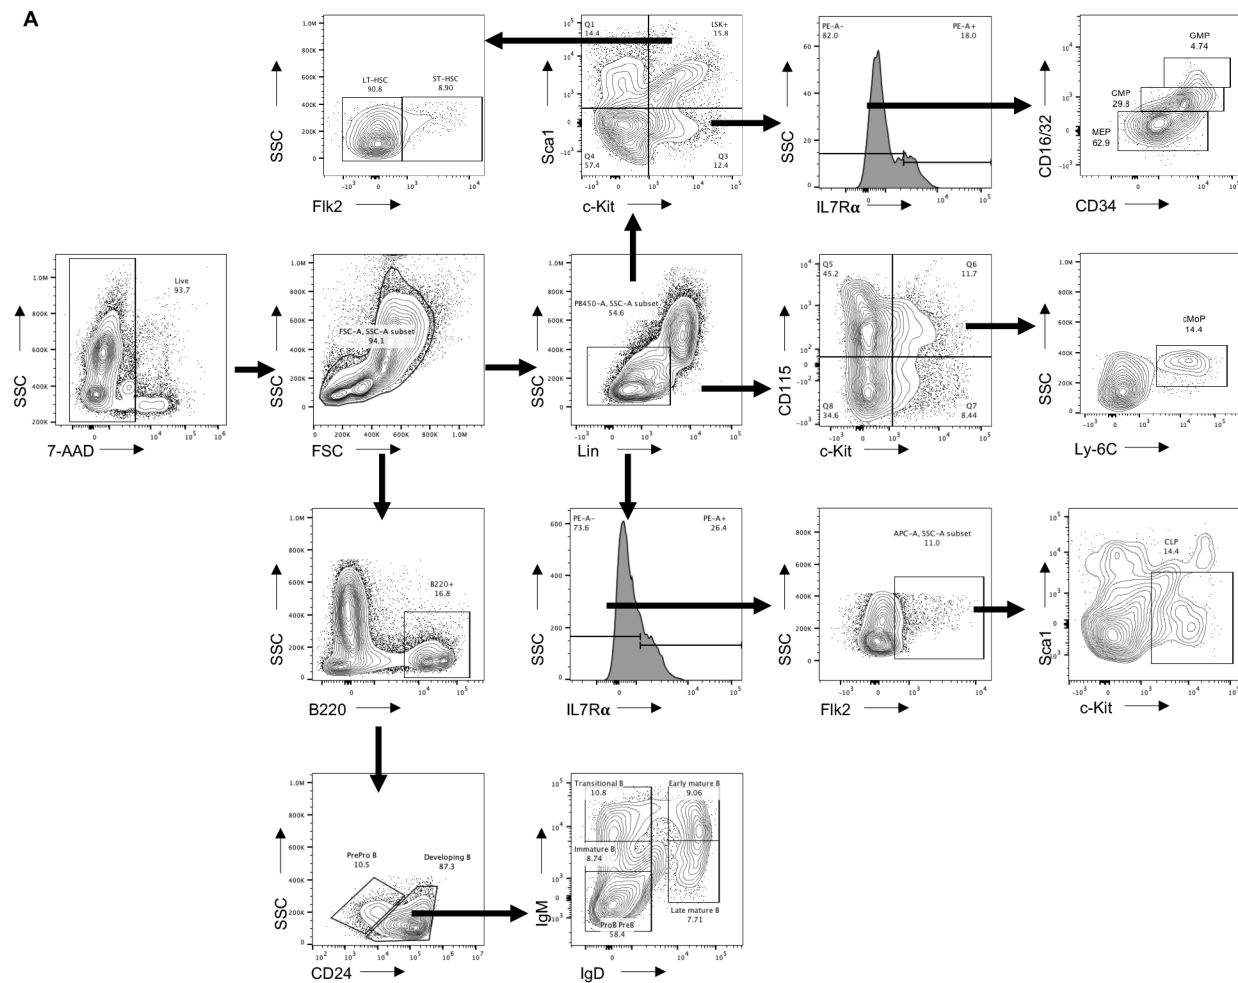

B

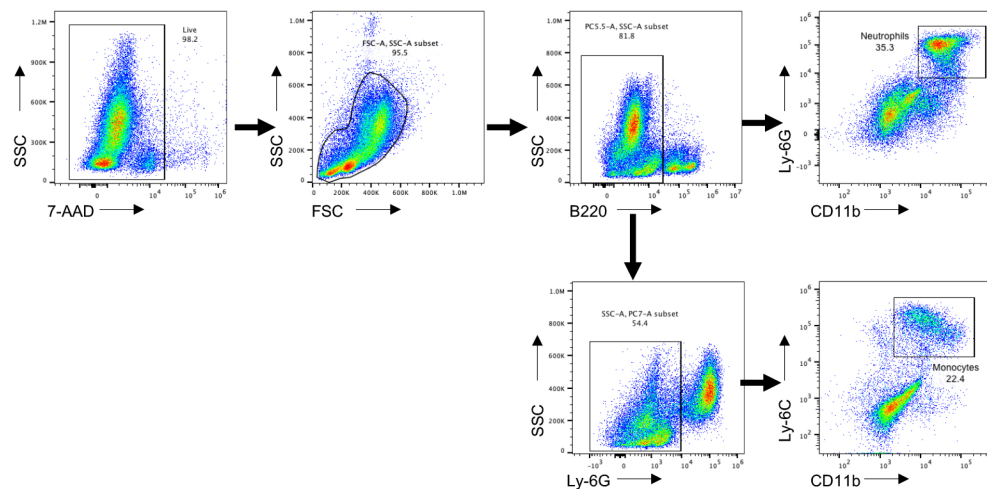

Supplement: supp [file elife-81480-supp-v1.zip]

**Figure 2 - figure supplement 1**

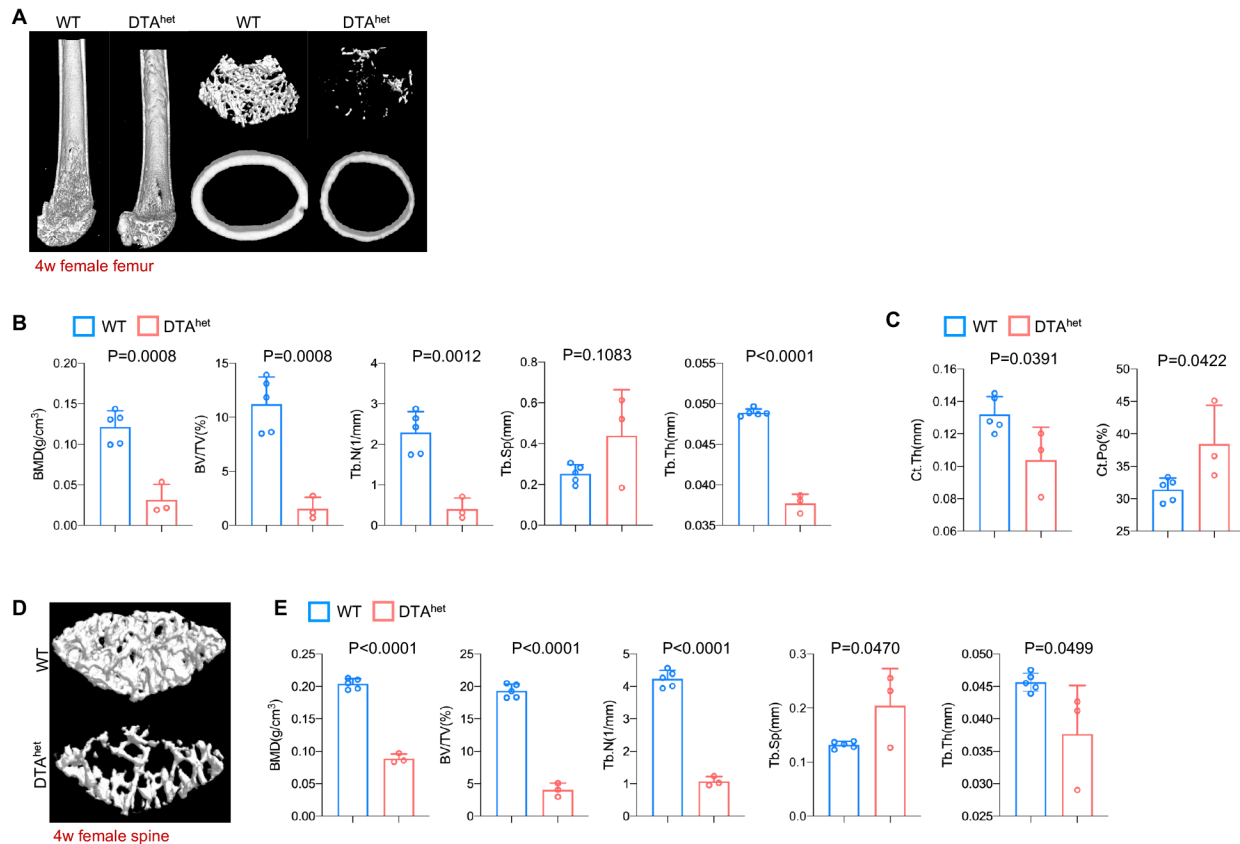

Supplement: supp [file elife-81480-supp-v1.zip]

**Figure 5 - figure supplement 3**

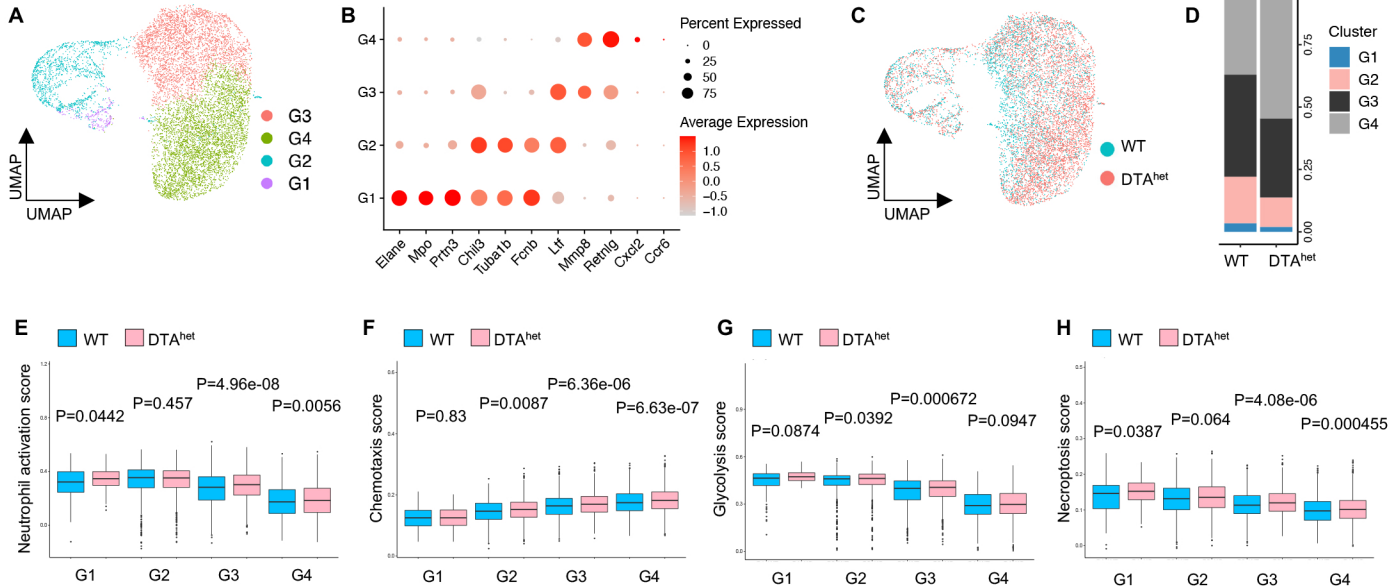

Supplement: supp [file elife-81480-supp-v1.zip]
